# Supplementary material for: Rapamycin Attenuates the Progression of Tau Pathology in P301S Tau Transgenic Mice
Source: PubMed Central journal article supplement (PMC3646815; doi:10.1371/journal.pone.0062459), 2013-05-07

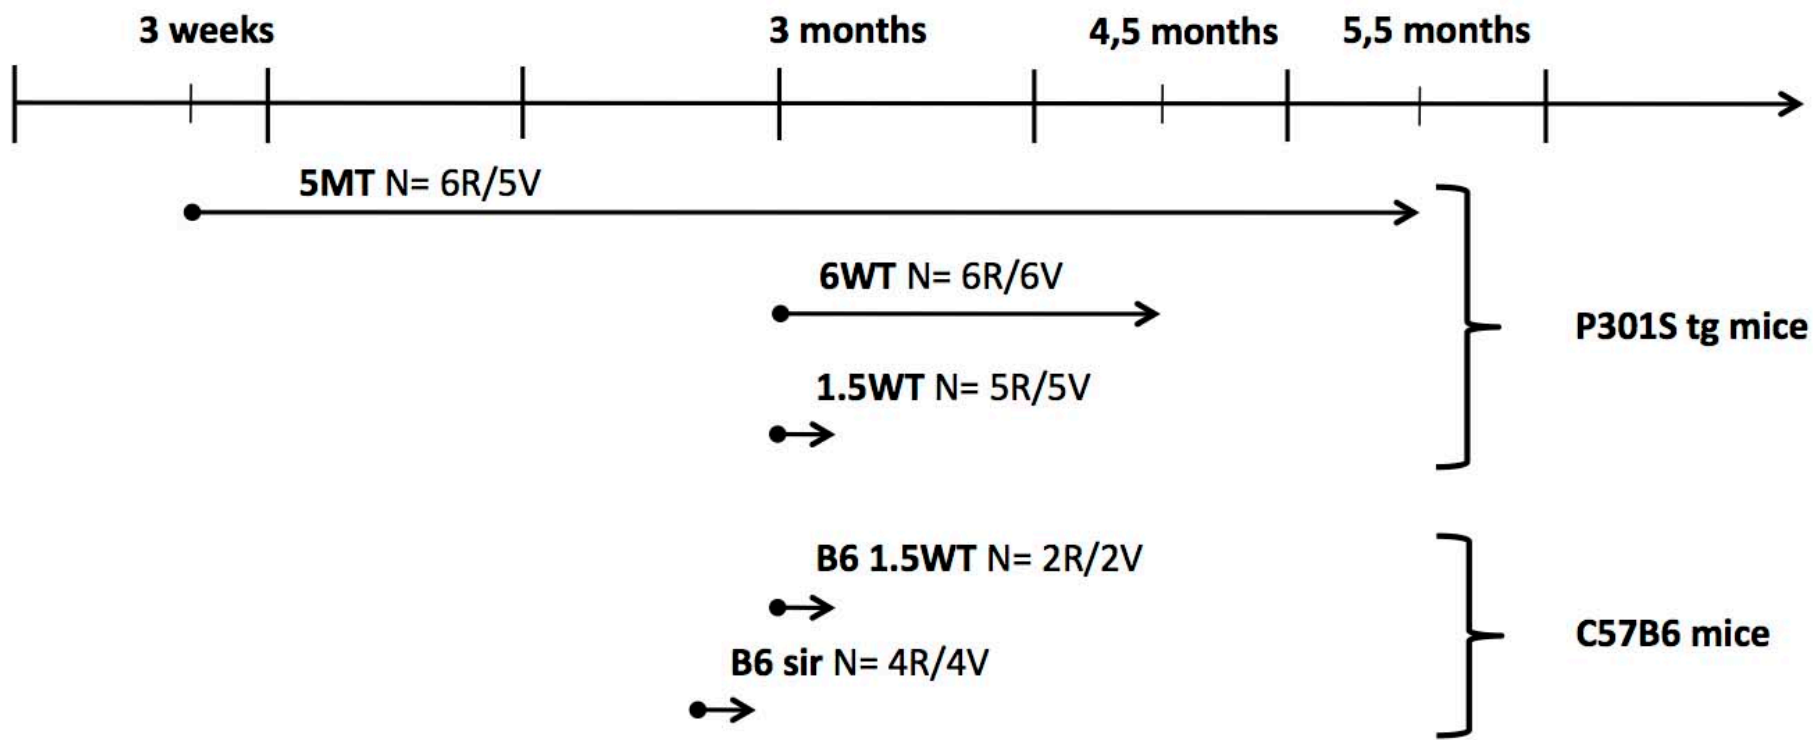

Supplement: pone.0062459.s001.pdf [file pone.0062459.s001.pdf]
